# Supplementary material for: Bifunctional gold–manganese oxide nanocomposites: benign electrocatalysts toward water oxidation and oxygen reduction
Source: Royal Society of Chemistry journal article supplement (doi:10.1039/c4ra05240d), 2014-01-01
Supplement: c4ra05240d1.pdf [file c4ra05240d1.pdf]

## Electronic Supplementary Information

Bifunctional Au-Mn<sub>3</sub>O<sub>4</sub> nanocomposites: Benign electrocatalysts towards  
water oxidation and oxygen reduction

Hasimur Rahaman, Koushik Barman, Sk Jasimuddin, and Sujit Kumar Ghosh\*

Department of Chemistry, Assam University, Silchar-788011, India

E-mail: sujit.kumar.ghosh@aus.ac.in

### ESI 1. Experimental

A schematic presentation showing the formation of Au-Mn<sub>3</sub>O<sub>4</sub> nanocomposites is shown in Scheme SI 1.

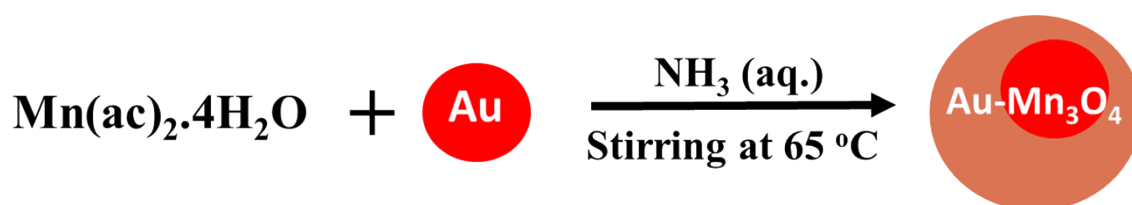

**Scheme SI 1.** Schematic presentation of the synthesis of Au-Mn<sub>3</sub>O<sub>4</sub> nanoparticles

The particles formed by this method were used as electrocatalysts for water oxidation reaction.

### ESI 2. Characterization of the evolution of the nanocomposites

**Absorption spectroscopy.** The absorption spectral features of Au, Mn<sub>3</sub>O<sub>4</sub> and Au-Mn<sub>3</sub>O<sub>4</sub> particles are presented in Fig. SI 1. Gold nanoparticles exhibit an absorption spectrum with maximum at 520 nm corresponding to the characteristic surface plasmon resonance of conduction electrons of the particles. The electronic absorption spectrum of manganese oxide nanoparticles shows three well-defined regions: the first portion from 250 to 425 nm, the second from 425 to 585 nm and the third one finishing at 700 nm. The first portion is attributed to the allowed O<sup>2-</sup> → Mn<sup>2+</sup> and O<sup>2-</sup> → Mn<sup>3+</sup> charge transfer transitions (A. Vázquez-Olmos, R. Redón, A. L. Fernández-Osorio, J. M. Saniger, *Appl. Phys. A* 2005, **81**, 1131–1134), and the last two can be reasonably related to d-d crystal field transitions, <sup>3</sup>E<sub>g</sub>(G) ← <sup>3</sup>T<sub>1g</sub>, <sup>3</sup>A<sub>2g</sub>(F) ← <sup>3</sup>T<sub>1g</sub>, <sup>3</sup>A<sub>2g</sub>(G) ← <sup>3</sup>T<sub>1g</sub>, <sup>3</sup>T<sub>2g</sub>(H) ← <sup>3</sup>T<sub>1g</sub>, <sup>3</sup>T<sub>1g</sub>(H) ← <sup>3</sup>T<sub>1g</sub> and <sup>3</sup>E<sub>g</sub>(H) ← <sup>3</sup>T<sub>1g</sub>, on octahedral Mn<sup>3+</sup> species (W. S. Kijlstra, E. K. Poels, A. Bliëk, B. M. Weckhuysen, R. A. Schoonheydt *J. Phys. Chem. B* 1997, **101**, 309–316). In the spectrum of the nanocomposites,

it is seen that the portion of the absorption band due to charge transfer transition of manganese oxide and the surface plasmon band of gold vanishes indicative of strong metal-support interaction (K. S. Kim, N. Winograd, *Chem. Phys. Lett.* 1975, **30**, 91–95).

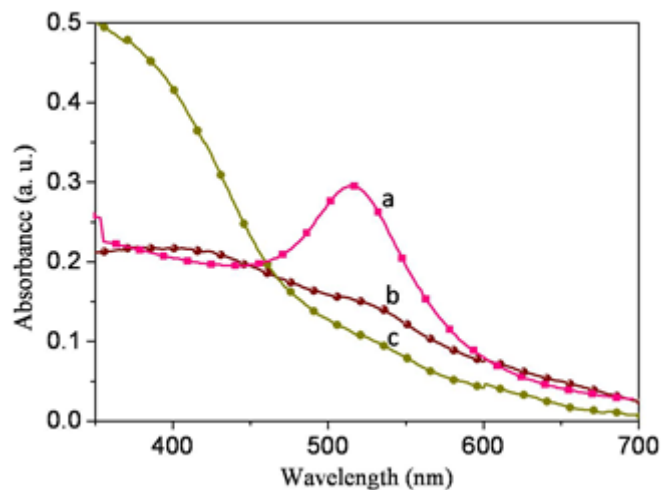

**Fig. SI 1.** Absorption spectra of (a) Au, (b)  $\text{Mn}_3\text{O}_4$  and (c) Au- $\text{Mn}_3\text{O}_4$  nanoparticles

**Fourier transform infrared spectroscopy.** Fig. SI 2 represents the FTIR spectra of  $\text{Mn}_3\text{O}_4$  nanoparticles before and after addition of gold nanoparticles. The presence of Mn-O stretching vibrations at 455, 505, 588 and 634  $\text{cm}^{-1}$  (trace a) confirms the presence of  $\text{Mn}_3\text{O}_4$  as the major phase (X. Tanga, J. Li, L. Suna, J. Hao, *Appl. Catal. B* 2010, **99**, 156–162). After the deposition of gold nanoparticles (trace b), the band at 455  $\text{cm}^{-1}$  is shifted to 459  $\text{cm}^{-1}$  and the bands at 505, 588 and 634  $\text{cm}^{-1}$  almost vanishes indicating the attachment of gold with the manganese oxide nanostructures.

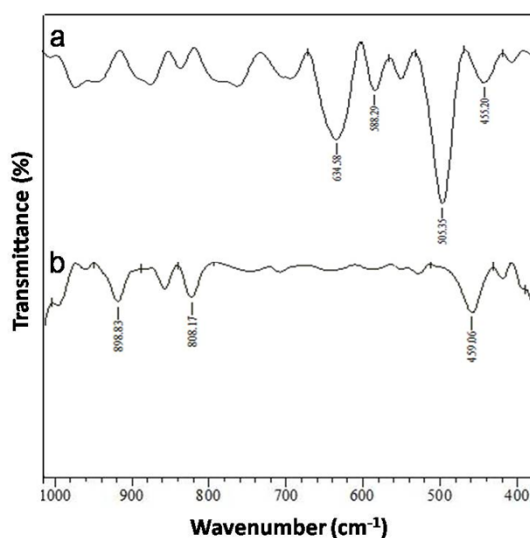

**Fig. SI 2.** FTIR spectra of  $\text{Mn}_3\text{O}_4$  (a) before and (b) after addition of gold nanoparticles

**X-ray diffraction pattern.** X-ray diffraction pattern of Au-Mn<sub>3</sub>O<sub>4</sub> is shown in Fig. SI 3. On the basis of the position and relative intensity, all diffraction peaks could be indexed to standard fcc structured Au and tetragonal hausmannite structure of Mn<sub>3</sub>O<sub>4</sub> nanoparticles with lattice parameters  $a = b = 5.762 \text{ \AA}$ , and  $c = 9.469 \text{ \AA}$  and space group  $I4_1/amd$ , which are consistent with the standard values of bulk Mn<sub>3</sub>O<sub>4</sub> (JCPDS# 24-0734) (T. Ahmad, K. V. Ramanujachary, S. E. Lofland, A. K. Ganguli, *J. Mater. Chem.* 2004, **14**, 3406–3410).

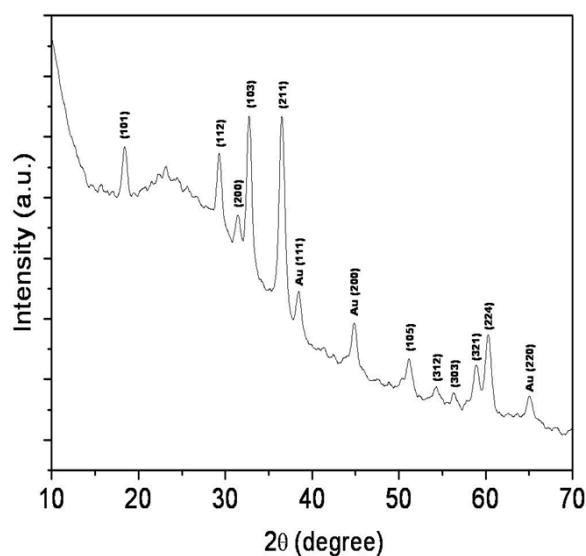

**Fig. SI 3.** X-ray diffraction pattern of Au-Mn<sub>3</sub>O<sub>4</sub> nanocomposites

**ESI 3. Modification of the gold electrodes for the study of electrocatalytic activity.** To investigate the electrocatalytic activity, the gold electrode was modified as described below. At first, the gold electrode was polished with 0.05  $\mu\text{m}$  alumina powder on a polishing microcloth and rinsed, methodically, with distilled water. The mechanically cleaned electrode was decontaminated electrochemically in 1.0 M H<sub>2</sub>SO<sub>4</sub> solution. A reproducible cyclic voltammogram between -0.2 to +1.5 V vs. Ag/AgCl electrode ascertained the cleanliness of the electrode. The electrode was, then, soaked with distilled water and subsequently, dipped in 10 mM 4-aminothiophenol (4-ATP) solution for 20 h to allow the formation of self-assembled monolayer (SAM) over gold surface. After that, the 4-ATP functionalized gold electrode was washed thoroughly with distilled water and placed in 10  $\mu\text{M}$  colloidal dispersion for the desired period to obtain the nanoparticles-modified electrode. The modification of the gold electrode with the nanoparticles is shown schematically in Scheme SI 2.

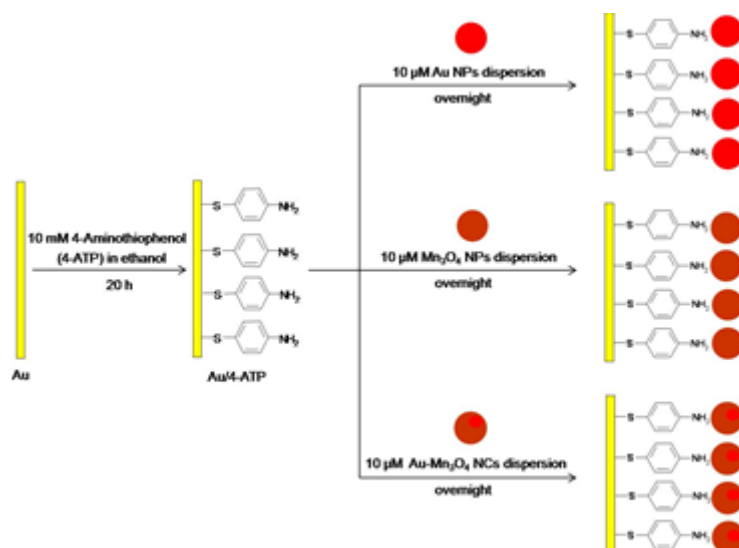

**Scheme SI 2.** Modification of the gold electrode with Au,  $\text{Mn}_3\text{O}_4$  and Au- $\text{Mn}_3\text{O}_4$  nanoparticles

Electrochemical impedance spectroscopy of  $1.0 \text{ mM } [\text{Fe}(\text{CN})_6]^{3-/4-}$  in  $0.1 \text{ M PBS}$  at bare, 4-ATP modified and NPs or NCs-immobilized gold electrode is shown in Fig. SI 4. It is seen that the charge transfer resistance ( $R_{\text{CT}}$ ) is very high when the gold electrode surface was modified with self-assembled monolayer (SAM) of 4-ATP (brown) than bare gold (black). The electronic communication between the redox species  $[\text{Fe}(\text{CN})_6]^{3-/4-}$  in solution and the underlying gold electrode becomes restricted due to formation of SAM. After the immobilization of NPs on 4-ATP/gold electrode, the  $R_{\text{CT}}$  decreased indicating that the NPs were, successfully, immobilized on the 4-ATP modified gold electrode and a good electronic communication was attained between the redox species  $[\text{Fe}(\text{CN})_6]^{3-/4-}$  in solution and the underlying Au electrode through NPs.

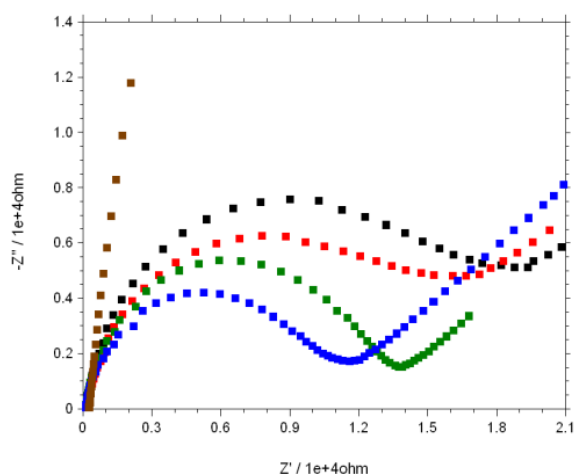

**Fig. SI 4.** Overlaid Nyquist plot ( $-Z''/vs.Z'$ ) for 1.0 mM  $[\text{Fe}(\text{CN})_6]^{3-/4-}$  in 0.1 M PBS (pH 7.5) at bare gold (black), 4-ATP/gold (brown), Au NPs/4-ATP/gold (red),  $\text{Mn}_3\text{O}_4\text{NPs}/4\text{-ATP/gold}$  (green) and  $\text{Au-Mn}_3\text{O}_4\text{NCs}/\text{ATP/gold}$  (blue) electrodes, where, anodic current amplitude,  $E_{ac} = 10$  mV while the frequency varies from 0.01 - 100000 Hz.

**ESI 4. Study of water oxidation reaction with different sizes of the gold nanoparticles in the composites.** To study the efficacy of the electrocatalytic activity of the gold-manganese oxide nanocomposites, three different sizes of gold nanoparticles (*viz.*, 10, 16, and 25 nm by varying  $[\text{Au}(\text{III})]/[\text{citrate}]$  ratio as 5.0, 3.5, and 2.5 respectively) prepared by Frens' citrate reduction procedure (G. Frens, *Nature* 1973, **241**, 20-22) were employed for the preparation of gold-manganese oxide nanocomposites and their electrocatalytic activity was studied towards oxygen reduction reaction. It is seen that  $\text{Au}(10)\text{-Mn}_3\text{O}_4$  are more efficient catalysts for water oxidation reaction than  $\text{Au}(16)\text{-Mn}_3\text{O}_4$  and  $\text{Au}(25)\text{-Mn}_3\text{O}_4$  composites (Fig. SI 5).

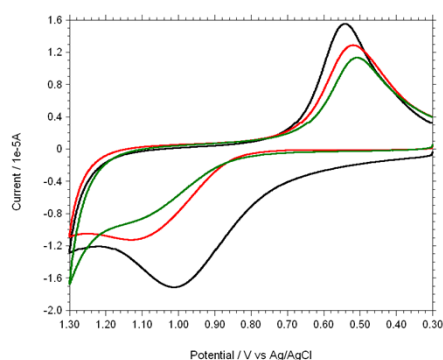

**Fig. SI 5.** Cyclic voltammogram for the water oxidation at  $\text{Au}(10)\text{-Mn}_3\text{O}_4$  (black),  $\text{Au}(16)\text{-Mn}_3\text{O}_4$  (red) and  $\text{Au}(25)\text{-Mn}_3\text{O}_4$  (green)-modified gold electrode in 0.1 M PBS at pH~7.5.

## ESI 5. Simultaneous oxygen reduction reaction during water oxidation

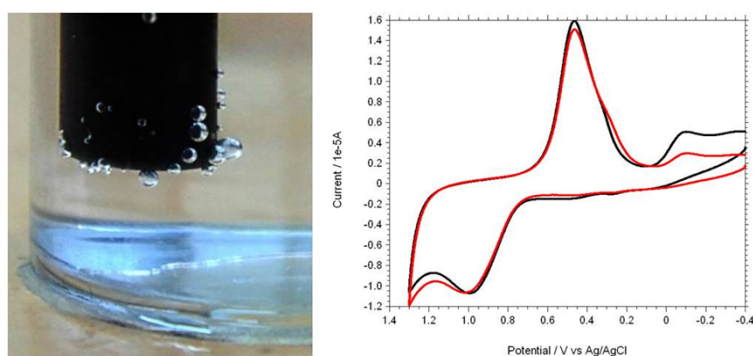

**Figure SI 6.**(left) Digital camera photograph showing oxygen gas evolution during water oxidation reaction; (right) cyclic voltammogram of oxygen reduction of Au-Mn<sub>3</sub>O<sub>4</sub> NCs/4-ATP/gold electrodes under ambient (black) and N<sub>2</sub>-saturated (red) PBS at pH~7.5.

## ESI 6. Overpotential of the Au-Mn<sub>3</sub>O<sub>4</sub> nanocomposites and some other electrocatalysts

**Table SI 1.** A comparative account of the pH condition of the experiment and overpotential of the Au-Mn<sub>3</sub>O<sub>4</sub> and some other electrocatalysts

| Catalyst                                  | pH          | Overpotential (mV) | Reference               |
|-------------------------------------------|-------------|--------------------|-------------------------|
| IrO <sub>x</sub>                          | 13.0        | 290                | Murray et al. [Ref. 12] |
| Nickel Film                               | 14.0        | 1070               | Dai et al. [Ref. 14]    |
| Co(III) <sub>3</sub> Co(IV)O <sub>4</sub> | 9.5         | 350-430            | Britt et al. [Ref. 15]  |
| copper–bipyridine                         | 11.8 – 13.3 | 750                | Mayer et al. [Ref. 17]  |
| Au-Mn <sub>3</sub> O <sub>4</sub>         | 7.5         | 370                | Present work            |
